# Supplementary material for: A Paediatric Orthopaedic Curriculum for Medical Students: The Australian consensus
Source: Research Square preprint supplement (doi:10.21203/rs.3.rs-7971040/v1), 2025-12-22
Supplement: Supplementary file 1 [file f5df421ba98066debb9b24b9.docx]

**Supplementary Table 1**

|  | Topic | Must Know | Should Know | Do Not Need |
| --- | --- | --- | --- | --- |
| *General* |  |  |  |  |
|  | Non-Accidental Injury |  |  |  |
|  | Physeal Anatomy |  |  |  |
|  | Salter Harris Classification |  |  |  |
|  | Re-Modelling Potential |  |  |  |
|  | Physeal Complications (Growth Arrest) |  |  |  |
|  |  |  |  |  |
| *Clavicle/Humerus* |  |  |  |  |
|  | Medial Clavicle Physeal Fracture |  |  |  |
|  | Clavicle Shaft Fracture |  |  |  |
|  | Distal Clavicle Physeal Fractures |  |  |  |
|  | Proximal Humerus |  |  |  |
|  | Humeral Shaft Fracture |  |  |  |
|  |  |  |  |  |
| *Elbow* |  |  |  |  |
|  | Distal Humerus Physeal Separation |  |  |  |
|  | Supracondylar Humerus |  |  |  |
|  | Medial Epicondylar Fractures |  |  |  |
|  | Lateral Condyle Fracture |  |  |  |
|  | Olecranon Fractures |  |  |  |
|  | Radial Head And Neck Fractures |  |  |  |
|  | Nursemaid's Elbow |  |  |  |
|  | Elbow Dislocation |  |  |  |
|  |  |  |  |  |
| *Forearm* |  |  |  |  |
|  | Monteggia Fracture |  |  |  |
|  | Both Bone Forearm Fracture |  |  |  |
|  | Galeazzi Fracture |  |  |  |
|  | Distal Radius Fractures |  |  |  |
|  |  |  |  |  |
| *Pelvis and Femur* |  |  |  |  |
|  | Pelvis Fractures |  |  |  |
|  | Traumatic Hip Dislocation |  |  |  |
|  | Proximal Femur Fractures |  |  |  |
|  | Femoral Shaft Fractures |  |  |  |
|  | Distal Femoral Physeal Fractures |  |  |  |
|  |  |  |  |  |
| *Knee* |  |  |  |  |
|  | Tibial Eminence Fracture |  |  |  |
|  | Tibial Tubercle Fracture |  |  |  |
|  | Patella Sleeve Fracture |  |  |  |
|  | Proximal Tibia Metaphyseal Fractures |  |  |  |
|  |  |  |  |  |
| *Tibia and Ankle Trauma* | |  |  |  |
|  | Proximal Tibia Metaphyseal Fractures |  |  |  |
|  | Tibial Shaft Fractures |  |  |  |
|  | Tillaux Fractures |  |  |  |
|  | Triplane fractures |  |  |  |
|  |  |  |  |  |
| *Infection* |  |  |  |  |
|  | Osteomyelitis |  |  |  |
|  | Hip Septic arthritis |  |  |  |
|  | Transient synovitis of Hip |  |  |  |
|  | Psoas Abcess |  |  |  |
|  | SI joint infection |  |  |  |
|  | Lyme disease |  |  |  |
|  | Chronic recurrent multifocal OM (CRMO) |  |  |  |
|  |  |  |  |  |
| *Upper Extremity Conditions* | |  |  |  |
|  | Sprengels Deformity |  |  |  |
|  | Congenital Pseudoarthrosis Clavicle |  |  |  |
|  | Congenital Amputations |  |  |  |
|  | Obstetric Brachia Pleopathy (Erbs, Klumpke's Palsy) |  |  |  |
|  | Little League Elbow |  |  |  |
|  | Little League Shoulder |  |  |  |
|  |  |  |  |  |
| *Paediatric Hand* |  |  |  |  |
|  | Radial Club Hand |  |  |  |
|  | Ulna Club Hand |  |  |  |
|  | Congenital Radial Head Dislocation |  |  |  |
|  | Madelungs Deformity |  |  |  |
|  | Congenital Radial Ulna Synostosis |  |  |  |
|  | Cleft Hand |  |  |  |
|  | Symphalangism |  |  |  |
|  | Camptodactyly |  |  |  |
|  | Clinodactyly |  |  |  |
|  | Syndactyly |  |  |  |
|  | Poland Syndrome |  |  |  |
|  | Apert Syndrome |  |  |  |
|  | Polydactyly Of Hand |  |  |  |
|  | Macrodactyly |  |  |  |
|  | Constrictive Ring Syndrome |  |  |  |
|  | Thumb Hypoplasia |  |  |  |
|  | Congenital Trigger Thumb |  |  |  |
|  | Congenital Clasped Thumb |  |  |  |
|  |  |  |  |  |
| *Hip and Pelvis conditions* | |  |  |  |
|  | Developmental Dysplasia of the Hip |  |  |  |
|  | Developmental Coxa Vara |  |  |  |
|  | Bladder Exstrophy |  |  |  |
|  | Perthes Disease |  |  |  |
|  | Slipped Capital Femoral Epiphysis. |  |  |  |
|  | Proximal Femoral Focal Deficiency |  |  |  |
|  | ASIS And AIIS Avulsions |  |  |  |
|  |  |  |  |  |
| *Paediatric Knee* |  |  |  |  |
|  | Congenital Knee Dislocation |  |  |  |
|  | Congenital Patella Dislocation |  |  |  |
|  | Congenital Popliteal Webbing |  |  |  |
|  | Popliteal Cyst In Children |  |  |  |
|  | Bipartite Patella |  |  |  |
|  | Osteochondritis Dissecans |  |  |  |
|  | Osgood Schlatter’s Disease |  |  |  |
|  | Sinding Larsen Johansson Syndrome |  |  |  |
|  | Discoid Meniscus |  |  |  |
|  | Paediatric ACL |  |  |  |
|  |  |  |  |  |
| *Varus and Valus conditions* | |  |  |  |
|  | Infantile Blouts Disease |  |  |  |
|  | Adolescent Blouts Disease |  |  |  |
|  | Genu Valgum (Knock Knees) |  |  |  |
|  |  |  |  |  |
| *Tibial Bowing* |  |  |  |  |
|  | Neurofibromatosis |  |  |  |
|  | Fibular Deficiency (Hemimelia) |  |  |  |
|  | Congenital Pseudoarthrosis |  |  |  |
|  | Posteromedial Tibial Bowing |  |  |  |
|  | Tibial Deficiency |  |  |  |
|  |  |  |  |  |
| *Leg Conditions:* |  |  |  |  |
|  | Leg Length Discrepancy |  |  |  |
|  | Hemihypertrophy |  |  |  |
|  | Leg Length Difference |  |  |  |
|  | Ball And Socket Ankle |  |  |  |
|  | Idiopathic Toe Walking |  |  |  |
|  |  |  |  |  |
| *Rotational deformities* | |  |  |  |
|  | Femoral Anterversion |  |  |  |
|  | Internal Tibial Torsion |  |  |  |
|  | External Tibia Torsion |  |  |  |
|  | Metatarsus Adductus/Screw Foot |  |  |  |
|  |  |  |  |  |
| *Paediatric Foot* |  |  |  |  |
|  | Clubfoot (Congenital Talipes Equinovarus) |  |  |  |
|  | Cavovarus Foot |  |  |  |
|  | Equinovarus Foot |  |  |  |
|  | Tarsal Coalition |  |  |  |
|  | Congenital Vertical Talus |  |  |  |
|  | Flexible Pes Planovalgus (Flexible Flatfoot) |  |  |  |
|  | Accessory Navicular |  |  |  |
|  | Calcaneovalgus Foot |  |  |  |
|  | Equinovalgus Foot |  |  |  |
|  | Kohler's Disease |  |  |  |
|  | Sever's Disease |  |  |  |
|  | Iselin's Disease |  |  |  |
|  | Juvenile Bunion |  |  |  |
|  | Congenital Hallus Varus |  |  |  |
|  | Syndactyly Of The Toes |  |  |  |
|  | Polydactyly Of Foot |  |  |  |
|  | Oligodactyly |  |  |  |
|  | Overlapping Toe |  |  |  |
|  | Congenital Curly Toe |  |  |  |
|  | Brachymetatarsia |  |  |  |
|  | Local Gigantism |  |  |  |
|  | Epiphyseal Bracket |  |  |  |
|  |  |  |  |  |
| *Cerebral Palsy:* |  |  |  |  |
|  | General Principles (Definition and Classification) |  |  |  |
|  | Cerebral Palsy- Hip Conditions |  |  |  |
|  | Cerebral Palsy- Gait Conditions |  |  |  |
|  | Cerebral Palsy- Foot Conditions |  |  |  |
|  | Cerebral Palsy- Upper Extremity Conditions |  |  |  |
|  | Cerebral Palsy- Spinal Disorders |  |  |  |
|  |  |  |  |  |
| *Musculor Dystrophies* | |  |  |  |
|  | Duchenne Muscular Dystrophy |  |  |  |
|  | Facioscapulohumeral Muscular Dystrophy |  |  |  |
|  |  |  |  |  |
| *Neuromuscular* |  |  |  |  |
|  | Charcot-Marie-Tooth Disease |  |  |  |
|  | Friedreich's Ataxia |  |  |  |
|  | Spinal Muscular Atrophy |  |  |  |
|  | Myelodysplasia (Spina Bifida) |  |  |  |
|  | Sacral Agenesis |  |  |  |
|  |  |  |  |  |
| *Connective Tissue* |  |  |  |  |
|  | Marfan Syndrome |  |  |  |
|  | Arthrogryposis |  |  |  |
|  | Osteogenesis Imperfecta |  |  |  |
|  | Osteopetrosis |  |  |  |
|  | Larsen's Syndrome |  |  |  |
|  | Ehlers-Danlos Syndrome |  |  |  |
|  |  |  |  |  |
| *Dwarfism:* |  |  |  |  |
|  | Achondroplasia |  |  |  |
|  | Pseudoachondroplasia |  |  |  |
|  | Multiple Epiphyseal Dysplasia (Med) |  |  |  |
|  | Spondyloepiphyseal Dysplasia |  |  |  |
|  | Diastrophic Dysplasia |  |  |  |
|  | Kniest Dysplasia |  |  |  |
|  | Metaphyseal Chondrodysplasia |  |  |  |
|  | Cleidocranial Dysplasia |  |  |  |
|  | Mucopolysaccharidoses |  |  |  |
|  |  |  |  |  |
| *Chromosomal* |  |  |  |  |
|  | Down Syndrome |  |  |  |
|  | Prader Willi Syndrom |  |  |  |
|  | Turners Syndrome |  |  |  |
|  |  |  |  |  |
| *Other* |  |  |  |  |
|  | Beckwith-Wiedemann Syndrome |  |  |  |
|  | Gauchers Disease |  |  |  |
|  | Fetal Alchohol syndrome |  |  |  |
|  | Trevors disease |  |  |  |
|  | Rett Syndrome |  |  |  |
|  | Nail-Patella Syndrome |  |  |  |
|  | Goldenhar Syndrome |  |  |  |
|  | Juvenile Idiopathic Arthritis |  |  |  |
